# Supplementary material
Source: Springer Nature journal article supplement (https://www.springermedizin.de/resource/supplementary/12943_2009_565_MOESM1_ESM.pdf/9554982)

## (A) Genomic context of the bi-directional promoter

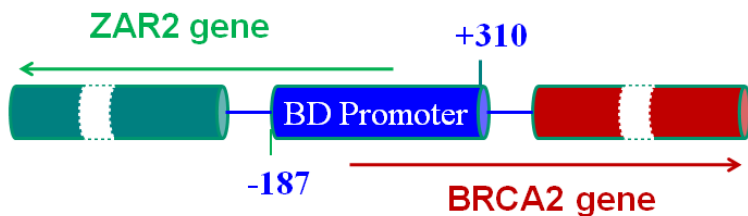

## (B) Promoter-reporter constructs

### (i) Single reporter constructs

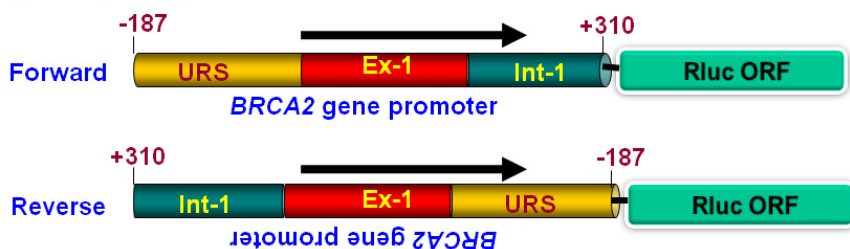

### (ii) Dual reporter construct

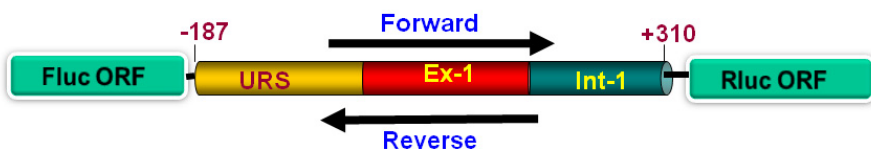

## (C) Luciferase assay for the evaluation of BRCA2 (forward) and ZAR2 (reverse) promoter activities

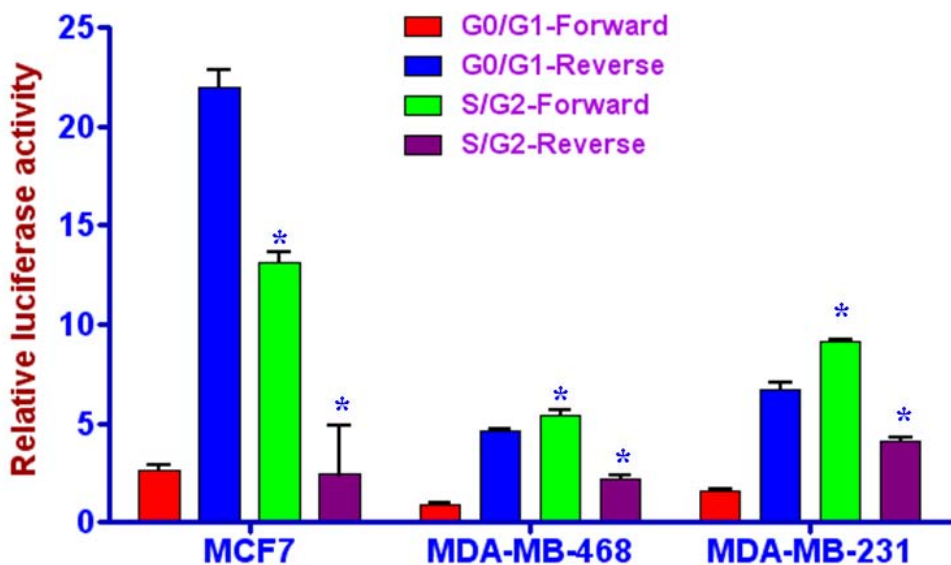

Supplement: MOESM1 [file 9554982]
